# Supplementary material for: Field-Deployable Computer Vision Wood Identification of Peruvian Timbers
Source: Front Plant Sci. 2021 Jun 2;12:647515. doi: 10.3389/fpls.2021.647515 (PMC8206804; doi:10.3389/fpls.2021.647515)
Supplement: Supplementary file 1 [file Data_Sheet_1.xlsx]

## Sheet: PROD MAD ROLLIZA X ESPECIE
MINAGRI-Servicio Nacional Forestal y de Fauna Silvestre-SERFOR
CUADRO Nº 8	PERÚ: PRODUCCIÓN DE MADERA ROLLIZA
	POR ESPECIE, AÑO 2019 p/.
ESPECIE
Nombre Común	Nombre Científico	TOTAL
		(m3)		GENUS	TOTAL VOLUME (m3)	% of Total Volume Analyzed		GENUS	TOTAL VOLUME (m3)	% of Total Volume Produced
Ishpingo	Amburana cearensis	16313.5		Amburana	16313.5	0.0221801		Dipteryx	143592	0.110925
Moena amarilla	Aniba amazonica	59.454		Aniba	4531.2	0.0061607		Cedrelinga	83436.1	0.0644542
	Aniba canelilla	32.273		Aspidosperma	16922.1	0.0230076		Cariniana	76283.4	0.0589288
	Aniba gigantifolia	2.931		Brosimum	40141.2	0.0545766		Guazuma	70056.2	0.0541183
Anís moena	Aniba guianensis	28.064		Calycophyllum	16675.4	0.0226721		Maquira	67583.6	0.0522082
Moena	Aniba guianensis	179.069		Cariniana	76283.4	0.103716		Copaifera	53754.6	0.0415253
	Aniba guianensis	1238.31		Cedrela	6575.55	0.00894024		Brosimum	40141.2	0.031009
	Aniba muca	317.864		Cedrelinga	83436.1	0.113441		Eucalyptus	34717.2	0.026819
Alcanfor moena	Aniba panurensis	391.618		Chorisia	576.894	0.000784355		Virola	24172.7	0.0186734
	Aniba panurensis	938.635		Copaifera	53754.6	0.0730857		Myroxylon	19035.7	0.014705
Moena alcanfor	Aniba panurensis	618.268		Dipteryx	143592	0.19523		Hura crepitans	18831.1	0.014547
Moena negra	Aniba perutilis	192.952		Eucalyptus	34717.2	0.0472021		Aspidosperma	16922.1	0.0130723
	Aniba puchuri minor	6.766		Guazuma	70056.2	0.0952496		Calycophyllum	16675.4	0.0128817
	Aniba puchury-minor	375.919		Hura crepitans	18831.1	0.0256031		Amburana	16313.5	0.0126022
Moena rosada	Aniba rosaeodora	78.636		Iryanthera	2463.04	0.0033488		Schizolobuim	12970.9	0.01002
	Aniba sp	70.4443		Maquira	67583.6	0.0918878		Pinus	11743.4	0.00907177
Pumaquiro	Aspidosperma cylindrocarpon	63.809		Myroxylon	19035.7	0.0258813		Poulsenia	8943.72	0.00690901
	Aspidosperma macrocarpon	15987.2		Ormosia	4804.4	0.00653214		Cedrela	6575.55	0.0050796
Remo caspi	Aspidosperma nitida	54.852		Pinus	11743.4	0.0159666		Ormosia	4804.4	0.00371139
	Aspidosperma parvifolia	5.915		Poulsenia	8943.72	0.01216		Aniba	4531.2	0.00350035
Quillobordón	Aspidosperma parvifolium	522.963		Pouteria		0		Iryanthera	2463.04	0.0019027
	Aspidosperma schultesii	189.287		Schizolobuim	12970.9	0.0176355		Swietenia	1376.99	0.00106372
	Aspidosperma sp	21.8497		Swietenia	1376.99	0.00187218		Chorisia	576.894	0.000445649
	Aspidosperma subincanum	67.2843		Virola	24172.7	0.0328657		Pouteria		0
	Aspidosperma vargasii	8.94571
Congona	Brosimum alicastrum	10090.7			735501			Analyzed volume	735501	0.568173
	Brosimum alicastrum	6.379						Total volume 2019	1.2945e+06
	Brosimum alicastrum	4558.98
Chingonga	Brosimum utile	50.004
	Brosimum utile	1928.67
Palo leche	Brosimum utile	9.888
	Brosimum utile	23496.5
Azufre	Calophyllum brasiliense	139.835
Lagarto caspi	Calophyllum brasiliense	454.201
Capirona	Calycophyllum sp.	2.458
	Calycophyllum spruceanum	15343.4
	Calycophyllum spruceanum	268.596
Copaiba	Calycophyllum spruceanum	466.893
	Cariniana decandra	21948.4
	Cariniana decandra	2121.07
	Cariniana decandra	594.553
Papelillo caspi	Cariniana decandra	150.03
	Cariniana domestica	2445.64
	Cariniana domestica	16.5919
	Cariniana domestica	161.199
Misa	Cariniana domestica	1656.45
	Cariniana estrellensis	45938.9
Cachimbo colorado	Cariniana estrellensis	306.445
Cachimbo negro	Cariniana estrellensis	144.997
	Cariniana estrellensis	19.809
	Cariniana estrellensis	301.825
	Cariniana estrellensis	455.661
	Cariniana excelsa	2.953
	Cariniana racemosa	0.668764
	Cariniana sp	18.222
Cedro	Cedrela angustifolia	140.154
Cedro blanco	Cedrela angustifolia	71.264
	Cedrela angustifolia	266.487
Cedro de bajeal	Cedrela fissilis	182.966
Cedro huasca	Cedrela fissilis	175.62
Cedro lila	Cedrela montana	826.7
Cedro macho	Cedrela montana	4.024
Cedro virgen	Cedrela montana	186.513
	Cedrela odorata	4719.95
Cedro lagarto	Cedrela odorata	1.88
Tornillo	Cedrelinga cateniformis	83436.1
	Chorisia insignis	26.1715
	Chorisia integrifolia	550.722
	Copaifera paupera	26504.3
	Copaifera reticulata	27250.3
	Dipteryx odorata	236.806
	Dipteryx odorata	143355
	Eucaliptus citriodora	93.007
	Eucaliptus globulus	34107.5
	Eucalyptus grandis	335.778
	Eucalyptus saligna	46.413
	Eucalyptus torelliana	134.464
Bolaina	Guazuma crinita	37705.1
Bolaina blanca	Guazuma crinita	32349.1
Manzano	Guazuma crinita	2.045
Catahua	Hura crepitans	18831.1
Cumala	Iryanthera grandis	154.284
	Iryanthera juruensis	1256.29
	Iryanthera paraensis	1049.5
	Iryanthera sp.	2.969
	Maquira coriacea	67583.6
Estoraque	Myroxylon balsamum	19035.7
	Ormosia coccinea	4789.19
	Ormosia coccinea	15.204
Pino	Pinus patula	7019.84
	Pinus radiata	4723.58
Lanchan	Poulsenia armata	2610.68
Yanchama	Poulsenia armata	6333.04
	Schizolobium amazonicum	11408.9
	Schizolobium amazonicum	55.157
	Schizolobium amazonicum	1.426
Pino chuncho	Schizolobium amazonicum	1453.88
Ucshaquiro	Schizolobium amazonicum	1.54182
Utucuro	Schizolobium amazonicum	50.047
Caoba	Swietenia macrophylla	1376.99
Cumala	Virola albidiflora	3916.39
	Virola calophylla	5544.85
	Virola decorticans	480.715
	Virola elongata	651.296
	Virola loretensis	169.771
	Virola pavonis	6.099
	Virola sebifera	13403.6
Total		735501
p/. Información preliminar
Fuente: GORES-Direcciones Ejecutivas de Recursos Naturales , Administraciones Técnicas Forestales y de Fauna Silvestre
Elaboración: SERFOR-Dirección General de Información y Ordenamiento Forestal y de Fauna Silvestre-DGIOFFS-DIR

## Sheet: PROD. MAD ASER.POR ESPECIE
MINAGRI-Servicio Nacional Forestal y de Fauna Silvestre-SERFOR
CUADRO Nº 11	PERÚ: PRODUCCIÓN DE MADERA ASERRADA
	POR ESPECIE, AÑO 2019p/.
ESPECIE		MADERA
Nombre Común	Nombre Científico	ASERRADA
		(m3)		GENUS	TOTAL VOLUME (m3)	% of Total Volume Analyzed		GENUS	TOTAL VOLUME (m3)	% of Total Volume Produced
Ishpingo	Amburana cearensis	5907.81		Amburana	5907.81	0.0150299		Cedrelinga	80760.6	0.13538
Moena	Aniba canelilla	5.895		Aniba	3417.98	0.00869556		Dipteryx	58773.1	0.0985221
Anís moena	Aniba guianensis	51.751		Aspidosperma	9150.05	0.0232783		Cariniana	43265.3	0.0725261
Anís moena	Aniba guianensis	14.521		Brosimum	26156.5	0.0665439		Copaifera	33851.9	0.0567464
Moena amarilla	Aniba guianensis	1059.74		Calycophyllum	11719.2	0.0298144		Guazuma	27711.8	0.0464537
Moena amarilla	Aniba muca	629.829		Cariniana	43265.3	0.11007		Brosimum	26156.5	0.0438465
Alcanfor moena	Aniba panurensis	308.227		Cedrela	5187.25	0.0131967		Virola	23140.5	0.0387907
Alcanfor moena	Aniba panurensis	435.234		Cedrelinga	80760.6	0.20546		Hura crepitans	16847.3	0.0282414
Moena alcanfor	Aniba panurensis	169.7		Chorisia	1378.06	0.00350588		Calycophyllum	11719.2	0.019645
Moena negra	Aniba perutilis	30.308		Copaifera	33851.9	0.0861215		Eucalyptus	9465.67	0.0158674
Moena negra	Aniba puchury-minor	438.327		Dipteryx	58773.1	0.149523		Aspidosperma	9150.05	0.0153383
Nogal negro	Aniba puchury-minor	1.342		Eucalyptus	9465.67	0.0240813		Pinus	7571.08	0.0126915
Moena rosada	Aniba roseadora	273.097		Guazuma	27711.8	0.0705007		Myroxylon	6890.35	0.0115504
Pumaquiro	Aspidosperma cylindrocarpon	4.653		Hura crepitans	16847.3	0.0428607		Amburana	5907.81	0.00990335
Pumaquiro	Aspidosperma macrocarpon	8583.37		Iryanthera	1618.11	0.00411657		Schizolobuim	5713.9	0.00957829
Remo caspi	Aspidosperma nitida	15.134		Maquira	5611.33	0.0142756		Poulsenia	5646.56	0.00946541
Remo caspi	Aspidosperma parvifolium	1.384		Myroxylon	6890.35	0.0175295		Maquira	5611.33	0.00940634
Quillobordón	Aspidosperma parvifolium	200.527		Ormosia	2641.89	0.00672115		Cedrela	5187.25	0.00869546
Quillobordón	Aspidosperma schultesii	324.239		Pinus	7571.08	0.0192613		Aniba	3417.98	0.0057296
Cushante	Aspidosperma sp.	2.643		Poulsenia	5646.56	0.0143652		Ormosia	2641.89	0.00442864
Cushante	Aspidosperma subincanum	16.884		Pouteria		0		Iryanthera	1618.11	0.00271245
Cushante	Aspidosperma vargasii	1.214		Schizolobuim	5713.9	0.0145365		Chorisia	1378.06	0.00231006
Catahua	Brosimum alicastrum	1.515		Swietenia	645.38	0.00164189		Swietenia	645.38	0.00108186
Congona	Brosimum alicastrum	9874.1		Virola	23140.5	0.0588709		Pouteria		0
Congona	Brosimum alicastrum	6.308
Machinga	Brosimum alicastrum	2277.76			393072			Analyzed volume	393072	0.658911
Mashonaste	Brosimum utile	234.955						Total volume 2019	596547
Mashonaste	Brosimum utile	13.241
Mashonaste	Brosimum utile	1446.68
Palo manzano	Brosimum utile	0.294
Palo manzano	Brosimum utile	12301.7
Azufre caspi	Calophyllum brasiliense	41.265
Lagarto caspi	Calophyllum brasiliense	447.059
Lagarto caspi	Calycophyllum spruceanum	1.246
Capirona	Calycophyllum spruceanum	11227.3
Capirona	Calycophyllum spruceanum	2.343
Almendro	Cariniana decandra	0.316
Almendro	Cariniana decandra	13307
Almendro	Cariniana decandra	666.013
Almendro	Cariniana decandra	119.628
Almendro	Cariniana decandra	2524.68
Papelillo	Cariniana decandra	249.869
Papelillo caspi	Cariniana decandra	1019.24
Papelillo caspi	Cariniana domestica	1296.9
Papelillo caspi	Cariniana domestica	9.788
Papelillo caspi	Cariniana domestica	26.646
Misa	Cariniana domestica	753.753
Misa	Cariniana estrellensis	21353.3
Misa	Cariniana estrellensis	1290.27
Cachimbo negro	Cariniana estrellensis	0.633
Cachimbo negro	Cariniana estrellensis	42.466
Cachimbo negro	Cariniana estrellensis	42.8
Cachimbo negro	Cariniana estrellensis	561.658
Cachimbo negro	Cariniana racemosa	0.347
Atoc Cedro	Cedrela angustifolia	48.031
Cedro	Cedrela angustifolia	53.558
Cedro	Cedrela angustifolia	93.193
Cedro de agua	Cedrela angustifolia	2.155
Cedro de agua	Cedrela fissilis	9.987
Cedro huasca	Cedrela fissilis	59.491
Cedro huasca	Cedrela montana	9.41
Cedro huasca	Cedrela montana	13.064
Cedro Lila	Cedrela montana	56.692
Cedro virgen	Cedrela montana	520.897
Cedro virgen	Cedrela odorata	4320.77
Lupuna	Cedrelinga cateniformi	13.365
Aguano	Cedrelinga cateniformis	49.258
Aguano	Cedrelinga cateniformis	2.465
Aguano	Cedrelinga cateniformis	0.7467
Tornillo	Cedrelinga cateniformis	80694.8
Palo colorado	Chorisia insignis	47.55
Cumala	Chorisia integrifolia	40.087
Cumala	Chorisia integrifolia	1290.42
Copaiba	Copaifera officinalis	210.882
Copaiba	Copaifera paupera	14042.3
Copaiba	Copaifera reticulata	19598.7
Charapilla	Dipteryx odorata	58773.1
	Eucalyptus globulus	1571.71
	Eucalyptus grandis	908.069
	Eucalyptus saligna	6804.7
	Eucalyptus torelliana	164.743
	Eucalyptus urograndis	16.44
Bolaina	Guazuma crinita	11844.8
Bolaina blanca	Guazuma crinita	15867
	Hura crepitans	16836
	Hura crepitans	8.733
Hualaja	Hura crepitans	2.561
Cumala	Iryanthera crassifolia	8.333
	Iryanthera elliptica	37.497
	Iryanthera grandis	71.781
	Iryanthera juruensis	227.228
	Iryanthera laevis	28.011
	Iryanthera paraensis	1245.26
	Maquira coriacea	5611.33
Estoraque	Myroxylon balsamum	6890.35
	Ormosia coccinea	2641.89
Pino	Pinus caribaea	338.225
	Pinus oocarpa	91.131
	Pinus patula	557.48
	Pinus radiata	36.12
	Pinus tecunumanii	6548.13
	Poulsenia armata	2.304
Canchan	Poulsenia armata	1.12
	Poulsenia armata	4.087
	Poulsenia armata	1688.01
	Poulsenia armata	1.708
	Poulsenia armata	0.75
	Poulsenia armata	0.212
Yacushapana negra	Poulsenia armata	2.436
	Poulsenia armata	3945.94
	Schizolobium amazonicum	1.583
	Schizolobium amazonicum	5276.29
	Schizolobium amazonicum	76.015
	Schizolobium amazonicum	351.879
	Schizolobium amazonicum	8.135
Caoba	Swietenia macrophylla	495.782
Caobilla	Swietenia sp	1.716
Cumala aguanillo	Swietenia sp	147.882
cumala	Virola calophylla	7172.12
	Virola decorticans	9.4
	Virola elongata	1683.76
	Virola flexuosa	1.676
	Virola loretensis	61.662
	Virola mollissima	62.146
	Virola pavonis	2409.01
	Virola sebifera	11740.7
TOTAL GENERAL		393072
p/. Información preliminar
Fuente: GORES-Direcciones Ejecutivas de Recursos Naturales , Administraciones Técnicas Forestales y de Fauna Silvestre
Elaboración: Servicio Nacional Forestal y de Fauna Silvestre-DGIOFFS-DIR

## Sheet: ROUND AND SAWN
VOLUME OF ROUND WOOD OF SELECTED SPECIES				VOLUME OF ROUND WOOD OF SELECTED SPECIES COMPARED TO TOTAL VOLUME 2019				VOLUME OF LUMBER OF SELECTED SPECIES				VOLUME OF LUMBER OF SELECTED SPECIES COMPARED TO TOTAL VOLUME 2019
GENUS	TOTAL VOLUME (m3)	% of Total Volume Analyzed		GENUS	TOTAL VOLUME (m3)	% of Total Volume Produced		GENUS	TOTAL VOLUME (m3)	% of Total Volume Analyzed		GENUS	TOTAL VOLUME (m3)	% of Total Volume Produced
Dipteryx	143592	0.19523		Dipteryx	143592	0.110925		Cedrelinga	80760.6	0.20546		Cedrelinga	80760.6	0.13538
Cedrelinga	83436.1	0.113441		Cedrelinga	83436.1	0.0644542		Dipteryx	58773.1	0.149523		Dipteryx	58773.1	0.0985221
Cariniana	76283.4	0.103716		Cariniana	76283.4	0.0589288		Cariniana	43265.3	0.11007		Cariniana	43265.3	0.0725261
Guazuma	70056.2	0.0952496		Guazuma	70056.2	0.0541183		Copaifera	33851.9	0.0861215		Copaifera	33851.9	0.0567464
Maquira	67583.6	0.0918878		Maquira	67583.6	0.0522082		Guazuma	27711.8	0.0705007		Guazuma	27711.8	0.0464537
Copaifera	53754.6	0.0730857		Copaifera	53754.6	0.0415253		Brosimum	26156.5	0.0665439		Brosimum	26156.5	0.0438465
Brosimum	40141.2	0.0545766		Brosimum	40141.2	0.031009		Virola	23140.5	0.0588709		Virola	23140.5	0.0387907
Eucalyptus	34717.2	0.0472021		Eucalyptus	34717.2	0.026819		Hura crepitans	16847.3	0.0428607		Hura crepitans	16847.3	0.0282414
Virola	24172.7	0.0328657		Virola	24172.7	0.0186734		Calycophyllum	11719.2	0.0298144		Calycophyllum	11719.2	0.019645
Myroxylon	19035.7	0.0258813		Myroxylon	19035.7	0.014705		Eucalyptus	9465.67	0.0240813		Eucalyptus	9465.67	0.0158674
Hura crepitans	18831.1	0.0256031		Hura crepitans	18831.1	0.014547		Aspidosperma	9150.05	0.0232783		Aspidosperma	9150.05	0.0153383
Aspidosperma	16922.1	0.0230076		Aspidosperma	16922.1	0.0130723		Pinus	7571.08	0.0192613		Pinus	7571.08	0.0126915
Calycophyllum	16675.4	0.0226721		Calycophyllum	16675.4	0.0128817		Myroxylon	6890.35	0.0175295		Myroxylon	6890.35	0.0115504
Amburana	16313.5	0.0221801		Amburana	16313.5	0.0126022		Amburana	5907.81	0.0150299		Amburana	5907.81	0.00990335
Schizolobuim	12970.9	0.0176355		Schizolobuim	12970.9	0.01002		Schizolobuim	5713.9	0.0145365		Schizolobuim	5713.9	0.00957829
Pinus	11743.4	0.0159666		Pinus	11743.4	0.00907177		Poulsenia	5646.56	0.0143652		Poulsenia	5646.56	0.00946541
Poulsenia	8943.72	0.01216		Poulsenia	8943.72	0.00690901		Maquira	5611.33	0.0142756		Maquira	5611.33	0.00940634
Cedrela	6575.55	0.00894024		Cedrela	6575.55	0.0050796		Cedrela	5187.25	0.0131967		Cedrela	5187.25	0.00869546
Ormosia	4804.4	0.00653214		Ormosia	4804.4	0.00371139		Aniba	3417.98	0.00869556		Aniba	3417.98	0.0057296
Aniba	4531.2	0.0061607		Aniba	4531.2	0.00350035		Ormosia	2641.89	0.00672115		Ormosia	2641.89	0.00442864
Iryanthera	2463.04	0.0033488		Iryanthera	2463.04	0.0019027		Iryanthera	1618.11	0.00411657		Iryanthera	1618.11	0.00271245
Swietenia	1376.99	0.00187218		Swietenia	1376.99	0.00106372		Chorisia	1378.06	0.00350588		Chorisia	1378.06	0.00231006
Chorisia	576.894	0.000784355		Chorisia	576.894	0.000445649		Swietenia	645.38	0.00164189		Swietenia	645.38	0.00108186
Pouteria		0		Pouteria		0		Pouteria		0		Pouteria		0
	735501			Analyzed volume	735501	0.568173			393072			Analyzed volume	393072	0.658911
				Total volume 2019	1.2945e+06							Total volume 2019	596547
